# Supplementary material
Source: PubMed Central journal article supplement (PMC2666167)
Supplement: supp_M800170-JLR200_Suppdata.pdf [file supp_M800170-JLR200_Suppdata.pdf]

## **SUPPLEMENTARY MATERIAL**

Table S1 Rel. mole % values of fatty acids from PL of cerebellum

Table S2 Rel. mole % values of fatty acids from PL of plasma

Table S3 Rel. mole % values of fatty acids from TG of plasma

Table S4 Rel. mole % values of fatty acids from CE of plasma

Table S5 Rel. mole % values of free fatty acids of plasma

Table S6 Rel. mole % values of fatty acids from PL of liver

Table S7 Rel. mole % values of fatty acids from TG of liver

Table S8 Rel. mole % values of fatty acids from CE of liver

Table S7 Rel. mole % values of free fatty acids of liver

Table S1: Fatty acid analysis on phospholipids of cerebellum

| Fatty Acid       | Balb/c         |                   | C57/BL6J       |                   |
|------------------|----------------|-------------------|----------------|-------------------|
|                  | <i>wt</i> -SFO | <i>fat-1</i> -SFO | <i>wt</i> -SFO | <i>fat-1</i> -SFO |
| <b>Saturate</b>  |                |                   |                |                   |
| 14:0             | 0.2 ± 0.0      | 0.2 ± 0.0         | 0.3 ± 0.0      | 0.2 ± 0.0         |
| 16:0             | 24.1 ± 0.3     | 22.2 ± 0.5        | 23.3 ± 0.4     | 21.9 ± 0.3        |
| 18:0             | 21.7 ± 0.5     | 22.1 ± 0.3        | 21.3 ± 0.6     | 21.0 ± 0.4        |
| 20:0             | 0.7 ± 0.0      | 0.7 ± 0.1         | 0.6 ± 0.1      | 0.6 ± 0.1         |
| 22:0             | 0.6 ± 0.0      | 0.7 ± 0.1         | 0.6 ± 0.1      | 0.6 ± 0.1         |
| 24:0             | 1.0 ± 0.1      | 1.1 ± 0.1         | 1.0 ± 0.2      | 0.9 ± 0.1         |
| <b>Monoenoic</b> |                |                   |                |                   |
| 16:1             | 0.6 ± 0.0      | 0.6 ± 0.0         | 0.7 ± 0.1      | 0.6 ± 0.0         |
| 18:1             | 20.0 ± 0.9     | 21.9 ± 0.2        | 21.3 ± 0.4     | 22.8 ± 0.4        |
| 20:1             | 2.2 ± 0.1      | 2.8 ± 0.2         | 2.0 ± 0.1      | 2.7 ± 0.3         |
| 22:1             | 0.3 ± 0.0      | 0.4 ± 0.1         | 0.3 ± 0.1      | 0.3 ± 0.1         |
| 24:1             | 1.9 ± 0.2      | 2.2 ± 0.3         | 1.7 ± 0.3      | 1.5 ± 0.3         |
| <b>n6</b>        |                |                   |                |                   |
| 18:2n6           | 1.5 ± 0.2      | 1.6 ± 0.3         | 1.5 ± 0.2      | 1.6 ± 0.2         |
| 18:3n6           | 0.1 ± 0.0      | 0.1 ± 0.0         | less than 0.05 | less than 0.05    |
| 20:2n6           | 0.6 ± 0.1      | 0.6 ± 0.1         | 0.6 ± 0.1      | 0.6 ± 0.0         |
| 20:3n6           | 0.7 ± 0.1      | 0.9 ± 0.3         | 0.6 ± 0.0      | 0.7 ± 0.0         |
| 20:4n6           | 7.5 ± 0.3      | 6.2 ± 0.5         | 8.6 ± 0.4      | 6.9 ± 0.2         |
| 22:4n6           | 2.5 ± 0.2      | 1.7 ± 0.3         | 2.5 ± 0.0      | 1.4 ± 0.3         |
| 22:5n6           | 5.5 ± 2.1      | 0.2 ± 0.0         | 7.4 ± 0.8      | 0.3 ± 0.0         |
| <b>n3</b>        |                |                   |                |                   |
| 18:3n3           | 0.1 ± 0.0      | 0.1 ± 0.0         | 0.1 ± 0.0      | 0.1 ± 0.0         |
| 20:5n3           | none detected  | 0.1 ± 0.0         | none detected  | 0.1 ± 0.0         |
| 22:5n3           | 0.1 ± 0.0      | 0.2 ± 0.0         | 0.1 ± 0.0      | 0.2 ± 0.0         |
| 22:6n3           | 8.0 ± 2.6      | 13.2 ± 0.5        | 5.6 ± 1.6      | 15.1 ± 0.7        |
| n6/n3            | 2.5 ± 1.0      | 0.8 ± 0.0         | 4.1 ± 1.5      | 0.7 ± 0.0         |
| Saturate/PUFA    | 1.8            | 1.8               | 1.7            | 1.6               |

Relative mole percentage (±SD; n=3-4) of fatty acids from phospholipids of cerebellum from Balb/c and C57 BL/6J strains.

*wt*-SFO, wild type mice fed with a safflower oil diet; *fat-1*-SFO, *fat-1* transgenic mice fed with a safflower oil diet.

Table S2: Fatty acid analysis on phospholipids of plasma

| Fatty Acid       | Balb/c         |                   | C57/BL6J       |                   |
|------------------|----------------|-------------------|----------------|-------------------|
|                  | <i>wt</i> -SFO | <i>fat-1</i> -SFO | <i>wt</i> -SFO | <i>fat-1</i> -SFO |
| <b>Saturate</b>  |                |                   |                |                   |
| 14:0             | 0.1 ± 0.0      | 0.1 ± 0.0         | 0.1 ± 0.0      | 0.1 ± 0.0         |
| 16:0             | 27.2 ± 0.2     | 29.6 ± 0.7        | 27.8 ± 0.9     | 28.6 ± 2.7        |
| 18:0             | 19.7 ± 1.5     | 17.1 ± 0.3        | 18.6 ± 0.5     | 20.8 ± 2.6        |
| 20:0             | 0.3 ± 0.0      | 0.3 ± 0.0         | 0.2 ± 0.1      | 0.3 ± 0.1         |
| 22:0             | 0.2 ± 0.0      | 0.2 ± 0.0         | 0.3 ± 0.1      | 0.4 ± 0.2         |
| 24:0             | 0.1 ± 0.0      | 0.1 ± 0.0         | 0.2 ± 0.1      | 0.3 ± 0.0         |
| <b>Monoenoic</b> |                |                   |                |                   |
| 16:1             | 0.4 ± 0.1      | 0.5 ± 0.1         | 0.7 ± 0.1      | 0.6 ± 0.1         |
| 18:1             | 5.2 ± 0.3      | 5.9 ± 0.4         | 7.5 ± 0.9      | 6.5 ± 0.9         |
| 20:1             | 0.2 ± 0.0      | 0.2 ± 0.0         | 0.2 ± 0.0      | 0.2 ± 0.0         |
| 22:1             | 0.1 ± 0.0      | 0.1 ± 0.0         | 0.1 ± 0.0      | 0.1 ± 0.0         |
| 24:1             | 0.3 ± 0.0      | 0.2 ± 0.0         | 0.6 ± 0.1      | 0.7 ± 0.1         |
| <b>n6</b>        |                |                   |                |                   |
| 18:2n6           | 28.5 ± 0.8     | 29.5 ± 0.9        | 24.0 ± 0.7     | 24.7 ± 2.3        |
| 18:3n6           | 0.1 ± 0.0      | 0.1 ± 0.0         | 0.2 ± 0.0      | 0.1 ± 0.1         |
| 20:2n6           | 0.4 ± 0.0      | 0.4 ± 0.0         | 0.4 ± 0.0      | 0.4 ± 0.0         |
| 20:3n6           | 0.9 ± 0.1      | 1.2 ± 0.1         | 1.3 ± 0.3      | 1.1 ± 0.2         |
| 20:4n6           | 11.8 ± 0.5     | 8.6 ± 0.1         | 13.0 ± 0.8     | 9.0 ± 1.5         |
| 22:4n6           | 0.4 ± 0.0      | 0.1 ± 0.0         | 0.5 ± 0.1      | 0.1 ± 0.0         |
| 22:5n6           | 2.7 ± 0.0      | 0.3 ± 0.0         | 3.6 ± 0.4      | 0.4 ± 0.1         |
| <b>n3</b>        |                |                   |                |                   |
| 18:3n3           | 0.4 ± 0.0      | 0.5 ± 0.0         | 0.2 ± 0.0      | 0.4 ± 0.1         |
| 20:5n3           | less than 0.05 | 0.4 ± 0.0         | none detected  | 0.4 ± 0.2         |
| 22:5n3           | less than 0.05 | 0.2 ± 0.0         | less than 0.05 | 0.2 ± 0.1         |
| 22:6n3           | 0.9 ± 0.1      | 4.3 ± 0.8         | 0.6 ± 0.1      | 4.4 ± 1.0         |
| n6/n3            | 33.3 ± 4.0     | 7.5 ± 1.2         | 56.0 ± 6.5     | 6.8 ± 1.6         |
| Saturate/PUFA    | 1.0            | 1.0               | 1.1            | 1.2               |

Relative mole percentage (±SD; n=3-5) of fatty acids from phospholipids of plasma from Balb/c and C57 BL/6J strains.

*wt*-SFO, wild type mice fed with a safflower oil diet; *fat-1*-SFO, *fat-1* transgenic mice fed with a safflower oil diet.

Table S3: Fatty acid analysis on triglycerides of plasma

| Fatty Acid       | Balb/c         |                   | C57/BL6J       |                   |
|------------------|----------------|-------------------|----------------|-------------------|
|                  | <i>wt</i> -SFO | <i>fat-1</i> -SFO | <i>wt</i> -SFO | <i>fat-1</i> -SFO |
| <b>Saturate</b>  |                |                   |                |                   |
| 14:0             | 0.6 ± 0.1      | 0.8 ± 0.2         | 0.4 ± 0.0      | 0.4 ± 0.1         |
| 16:0             | 13.5 ± 1.0     | 13.6 ± 1.7        | 16.0 ± 1.1     | 14.9 ± 1.4        |
| 18:0             | 2.9 ± 0.4      | 3.0 ± 0.4         | 2.7 ± 0.3      | 2.9 ± 0.6         |
| 20:0             | 0.3 ± 0.1      | 0.1 ± 0.0         | 0.2 ± 0.0      | 0.2 ± 0.1         |
| 22:0             | 0.1 ± 0.0      | 0.1 ± 0.0         | 0.1 ± 0.0      | 0.1 ± 0.0         |
| 24:0             | 0.1 ± 0.0      | 0.1 ± 0.0         | less than 0.05 | less than 0.05    |
| <b>Monoenoic</b> |                |                   |                |                   |
| 16:1             | 1.6 ± 0.0      | 1.8 ± 0.4         | 2.7 ± 0.1      | 2.4 ± 0.6         |
| 18:1             | 16.8 ± 0.8     | 17.9 ± 0.7        | 23.0 ± 2.0     | 20.7 ± 4.4        |
| 20:1             | 0.8 ± 0.2      | 0.8 ± 0.1         | 0.6 ± 0.1      | 0.7 ± 0.1         |
| 22:1             | 0.3 ± 0.1      | 0.3 ± 0.1         | 0.1 ± 0.0      | 0.2 ± 0.1         |
| 24:1             | 0.1 ± 0.0      | 0.1 ± 0.0         | 0.1 ± 0.0      | 0.1 ± 0.0         |
| <b>n6</b>        |                |                   |                |                   |
| 18:2n6           | 54.7 ± 0.4     | 52.9 ± 4.4        | 42.7 ± 1.4     | 46.8 ± 5.5        |
| 18:3n6           | 0.6 ± 0.1      | 0.4 ± 0.0         | 0.7 ± 0.2      | 0.7 ± 0.1         |
| 20:2n6           | 0.5 ± 0.0      | 0.5 ± 0.1         | 0.5 ± 0.1      | 0.5 ± 0.0         |
| 20:3n6           | 0.8 ± 0.0      | 0.9 ± 0.1         | 1.1 ± 0.3      | 1.0 ± 0.2         |
| 20:4n6           | 4.3 ± 0.9      | 2.9 ± 0.6         | 6.0 ± 0.8      | 4.1 ± 0.8         |
| 22:4n6           | 0.5 ± 0.1      | 0.4 ± 0.1         | 0.7 ± 0.1      | 0.5 ± 0.1         |
| 22:5n6           | 1.0 ± 0.2      | 0.4 ± 0.1         | 1.9 ± 0.6      | 0.6 ± 0.2         |
| <b>n3</b>        |                |                   |                |                   |
| 18:3n3           | 0.2 ± 0.0      | 0.5 ± 0.1         | 0.1 ± 0.0      | 0.4 ± 0.1         |
| 20:5n3           | none detected  | 0.4 ± 0.1         | none detected  | 0.5 ± 0.2         |
| 22:5n3           | less than 0.05 | 0.2 ± 0.1         | less than 0.05 | 0.2 ± 0.1         |
| 22:6n3           | 0.1 ± 0.0      | 1.7 ± 0.6         | 0.1 ± 0.0      | 1.8 ± 0.7         |
| n6/n3            | 173.0 ± 26.7   | 20.9 ± 6.1        | 162.4 ± 21.2   | 18.8 ± 8.4        |
| Saturate/PUFA    | 0.3            | 0.3               | 0.4            | 0.3               |

Relative mole percentage ( $\pm$ SD; n=3-5) of fatty acids from triglycerides of plasma from Balb/c and C57 BL/6J strains.

*wt*-SFO, wild type mice fed with a safflower oil diet; *fat-1*-SFO, *fat-1* transgenic mice fed with a safflower oil diet.

Table S4: Fatty acid analysis on cholesterol esters of plasma

| Fatty Acid       | Balb/c         |                   | C57/BL6J       |                   |
|------------------|----------------|-------------------|----------------|-------------------|
|                  | <i>wt</i> -SFO | <i>fat-1</i> -SFO | <i>wt</i> -SFO | <i>fat-1</i> -SFO |
| <b>Saturate</b>  |                |                   |                |                   |
| 14:0             | 0.3 ± 0.0      | 0.4 ± 0.0         | 0.4 ± 0.0      | 0.4 ± 0.1         |
| 16:0             | 4.5 ± 0.2      | 4.8 ± 0.2         | 4.9 ± 0.8      | 4.4 ± 0.3         |
| 18:0             | 0.9 ± 0.1      | 1.0 ± 0.2         | 1.3 ± 1.0      | 1.1 ± 0.6         |
| 20:0             | 0.1 ± 0.0      | 0.1 ± 0.0         | 0.1 ± 0.0      | 0.1 ± 0.0         |
| 22:0             | 0.1 ± 0.0      | 0.1 ± 0.0         | 0.1 ± 0.0      | less than 0.05    |
| 24:0             | less than 0.05 | less than 0.05    | less than 0.05 | less than 0.05    |
| <b>Monoenoic</b> |                |                   |                |                   |
| 16:1             | 2.4 ± 0.1      | 2.7 ± 0.5         | 3.0 ± 0.2      | 3.2 ± 1.0         |
| 18:1             | 7.1 ± 0.7      | 8.3 ± 1.0         | 7.1 ± 1.1      | 7.1 ± 1.2         |
| 20:1             | 0.1 ± 0.0      | 0.1 ± 0.0         | 0.1 ± 0.0      | less than 0.05    |
| 22:1             | 0.2 ± 0.0      | 0.2 ± 0.1         | 0.1 ± 0.0      | 0.2 ± 0.1         |
| 24:1             | 0.1 ± 0.0      | none detected     | less than 0.05 | 0.1 ± 0.1         |
| <b>n6</b>        |                |                   |                |                   |
| 18:2n6           | 43.1 ± 1.3     | 46.9 ± 0.1        | 39.4 ± 1.4     | 42.5 ± 3.4        |
| 18:3n6           | 0.6 ± 0.1      | 0.6 ± 0.1         | 0.9 ± 0.2      | 0.8 ± 0.2         |
| 20:2n6           | 0.1 ± 0.0      | 0.1 ± 0.0         | 0.1 ± 0.0      | less than 0.05    |
| 20:3n6           | 0.4 ± 0.1      | 0.6 ± 0.0         | 0.8 ± 0.3      | 0.6 ± 0.1         |
| 20:4n6           | 38.2 ± 0.8     | 28.4 ± 1.3        | 39.8 ± 1.2     | 32.7 ± 2.6        |
| 22:4n6           | 0.1 ± 0.0      | less than 0.05    | 0.1 ± 0.0      | less than 0.05    |
| 22:5n6           | 1.0 ± 0.0      | 0.1 ± 0.0         | 1.3 ± 0.1      | 0.2 ± 0.1         |
| <b>n3</b>        |                |                   |                |                   |
| 18:3n3           | 0.1 ± 0.0      | 0.4 ± 0.1         | less than 0.05 | 0.7 ± 0.3         |
| 20:5n3           | less than 0.05 | 1.2 ± 0.1         | none detected  | 1.4 ± 0.5         |
| 22:5n3           | less than 0.05 | 0.1 ± 0.0         | none detected  | 0.1 ± 0.0         |
| 22:6n3           | 0.6 ± 0.1      | 3.7 ± 0.4         | 0.5 ± 0.1      | 4.1 ± 0.4         |
| n6/n3            | 106.1 ± 9.7    | 14.0 ± 0.8        | 139.1 ± 27.4   | 12.0 ± 2.2        |
| Saturate/PUFA    | 0.1            | 0.1               | 0.1            | 0.1               |

Relative mole percentage (±SD; n=3-5) of fatty acids from cholesterol esters of plasma from Balb/c and C57 BL/6J strains.

*wt*-SFO, wild type mice fed with a safflower oil diet; *fat-1*-SFO, *fat-1* transgenic mice fed with a safflower oil diet.

Table S5: Fatty acid analysis on free fatty acids of plasma

| Fatty Acid       | Balb/c         |                   | C57/BL6J       |                   |
|------------------|----------------|-------------------|----------------|-------------------|
|                  | <i>wt</i> -SFO | <i>fat-1</i> -SFO | <i>wt</i> -SFO | <i>fat-1</i> -SFO |
| <b>Saturate</b>  |                |                   |                |                   |
| 14:0             | 1.5 ± 0.2      | 1.2 ± 0.3         | 2.5 ± 0.6      | 1.3 ± 0.5         |
| 16:0             | 26.9 ± 1.1     | 29.5 ± 2.3        | 26.2 ± 1.4     | 25.0 ± 1.2        |
| 18:0             | 13.2 ± 1.0     | 13.9 ± 1.3        | 10.6 ± 1.8     | 16.1 ± 7.3        |
| 20:0             | 0.3 ± 0.0      | 0.3 ± 0.0         | 0.3 ± 0.1      | 0.4 ± 0.1         |
| 22:0             | 0.1 ± 0.0      | 0.2 ± 0.0         | 0.1 ± 0.0      | 0.2 ± 0.1         |
| 24:0             | 0.1 ± 0.0      | 0.1 ± 0.0         | 0.1 ± 0.0      | 0.1 ± 0.0         |
| <b>Monoenoic</b> |                |                   |                |                   |
| 16:1             | 2.8 ± 0.2      | 2.3 ± 0.3         | 6.1 ± 0.5      | 4.4 ± 0.4         |
| 18:1             | 12.6 ± 0.5     | 13.5 ± 0.8        | 17.1 ± 0.8     | 14.3 ± 3.0        |
| 20:1             | 0.5 ± 0.1      | 0.5 ± 0.1         | 0.4 ± 0.1      | 0.4 ± 0.1         |
| 22:1             | 0.3 ± 0.1      | 0.3 ± 0.0         | 0.2 ± 0.0      | 0.6 ± 0.2         |
| 24:1             | none detected  | none detected     | 0.1 ± 0.0      | 0.1 ± 0.1         |
| <b>n6</b>        |                |                   |                |                   |
| 18:2n6           | 32.9 ± 1.0     | 30.4 ± 3.5        | 30.5 ± 3.0     | 29.3 ± 7.1        |
| 18:3n6           | 0.4 ± 0.1      | 0.3 ± 0.0         | 0.3 ± 0.0      | 0.3 ± 0.1         |
| 20:2n6           | 0.5 ± 0.0      | 0.5 ± 0.0         | 0.4 ± 0.0      | 0.4 ± 0.1         |
| 20:3n6           | 0.6 ± 0.1      | 0.6 ± 0.1         | 0.4 ± 0.1      | 0.5 ± 0.1         |
| 20:4n6           | 4.9 ± 0.4      | 3.4 ± 0.8         | 2.9 ± 0.6      | 2.9 ± 1.0         |
| 22:4n6           | 0.4 ± 0.0      | 0.2 ± 0.0         | 0.4 ± 0.1      | 0.2 ± 0.1         |
| 22:5n6           | 1.0 ± 0.1      | 0.3 ± 0.1         | 1.0 ± 0.1      | 0.3 ± 0.1         |
| <b>n3</b>        |                |                   |                |                   |
| 18:3n3           | 0.3 ± 0.0      | 0.5 ± 0.1         | 0.3 ± 0.3      | 0.4 ± 0.1         |
| 20:5n3           | none detected  | 0.2 ± 0.1         | none detected  | 0.3 ± 0.1         |
| 22:5n3           | 0.1 ± 0.0      | 0.2 ± 0.0         | less than 0.05 | 0.2 ± 0.1         |
| 22:6n3           | 0.3 ± 0.1      | 1.5 ± 0.3         | 0.1 ± 0.0      | 1.5 ± 0.3         |
| n6/n3            | 59.8 ± 7.8     | 14.5 ± 3.5        | 82.5 ± 27.3    | 12.2 ± 4.0        |
| Saturate/PUFA    | 1.0            | 1.2               | 1.1            | 1.2               |

Relative mole percentage ( $\pm$ SD; n=3-5) of fatty acids from free fatty acids of plasma from Balb/c and C57 BL/6J strains.

*wt*-SFO, wild type mice fed with a safflower oil diet; *fat-1*-SFO, fat-1 transgenic mice fed with a safflower oil diet.

Table S6: Fatty acid analysis on phospholipids of liver

| Fatty Acid       | Balb/c         |                   | C57/BL6J       |                   |
|------------------|----------------|-------------------|----------------|-------------------|
|                  | <i>wt</i> -SFO | <i>fat-1</i> -SFO | <i>wt</i> -SFO | <i>fat-1</i> -SFO |
| <b>Saturate</b>  |                |                   |                |                   |
| 14:0             | 0.1 ± 0.0      | 0.1 ± 0.0         | 0.1 ± 0.0      | 0.1 ± 0.0         |
| 16:0             | 22.1 ± 0.8     | 24.4 ± 0.7        | 21.5 ± 0.8     | 21.9 ± 1.6        |
| 18:0             | 17.5 ± 1.9     | 16.3 ± 0.3        | 19.6 ± 1.8     | 19.1 ± 2.1        |
| 20:0             | 0.2 ± 0.1      | 0.2 ± 0.1         | 0.1 ± 0.0      | 0.2 ± 0.1         |
| 22:0             | 0.3 ± 0.1      | 0.3 ± 0.1         | 0.3 ± 0.0      | 0.4 ± 0.2         |
| 24:0             | 0.2 ± 0.0      | 0.2 ± 0.0         | 0.3 ± 0.1      | 0.2 ± 0.0         |
| <b>Monoenoic</b> |                |                   |                |                   |
| 16:1             | 0.8 ± 0.1      | 0.8 ± 0.1         | 1.0 ± 0.3      | 0.8 ± 0.1         |
| 18:1             | 6.8 ± 0.5      | 6.7 ± 1.0         | 7.8 ± 0.9      | 6.7 ± 0.9         |
| 20:1             | 0.2 ± 0.0      | 0.2 ± 0.0         | 0.2 ± 0.0      | 0.2 ± 0.0         |
| 22:1             | 0.2 ± 0.1      | 0.1 ± 0.1         | 0.1 ± 0.0      | 0.1 ± 0.0         |
| 24:1             | 0.3 ± 0.0      | 0.3 ± 0.0         | 0.5 ± 0.1      | 0.3 ± 0.1         |
| <b>n6</b>        |                |                   |                |                   |
| 18:2n6           | 19.4 ± 0.2     | 18.9 ± 1.5        | 17.6 ± 1.8     | 19.8 ± 2.2        |
| 18:3n6           | 0.3 ± 0.0      | 0.2 ± 0.0         | 0.3 ± 0.1      | 0.3 ± 0.1         |
| 20:2n6           | 0.6 ± 0.1      | 0.6 ± 0.0         | 0.6 ± 0.2      | 0.6 ± 0.1         |
| 20:3n6           | 1.2 ± 0.0      | 1.5 ± 0.3         | 1.3 ± 0.4      | 1.4 ± 0.2         |
| 20:4n6           | 21.9 ± 0.5     | 17.4 ± 1.7        | 20.6 ± 1.5     | 17.8 ± 1.3        |
| 22:4n6           | 0.7 ± 0.0      | 0.3 ± 0.0         | 0.7 ± 0.1      | 0.3 ± 0.0         |
| 22:5n6           | 5.5 ± 0.7      | 0.5 ± 0.1         | 6.3 ± 2.3      | 0.6 ± 0.1         |
| <b>n3</b>        |                |                   |                |                   |
| 18:3n3           | 0.2 ± 0.1      | 0.2 ± 0.1         | 0.1 ± 0.0      | 0.2 ± 0.0         |
| 20:5n3           | none detected  | 0.3 ± 0.2         | none detected  | 0.3 ± 0.2         |
| 22:5n3           | less than 0.05 | 0.4 ± 0.0         | less than 0.05 | 0.3 ± 0.0         |
| 22:6n3           | 1.5 ± 0.1      | 10.2 ± 0.6        | 1.0 ± 0.1      | 8.4 ± 0.6         |
| n6/n3            | 28.0 ± 1.8     | 3.6 ± 0.2         | 40.4 ± 3.8     | 4.5 ± 0.4         |
| Saturate/PUFA    | 0.8            | 0.8               | 0.9            | 0.8               |

Relative mole percentage ( $\pm$ SD; n=3-4) of fatty acids from phospholipids of liver from Balb/c and C57 BL/6J strains.

*wt*-SFO, wild type mice fed with a safflower oil diet; *fat-1*-SFO, fat-1 transgenic mice fed with a safflower oil diet.

Table S7: Fatty acid analysis on triglycerides of liver

| Fatty Acid       | Balb/c         |                   | C57/BL6J       |                   |
|------------------|----------------|-------------------|----------------|-------------------|
|                  | <i>wt</i> -SFO | <i>fat-1</i> -SFO | <i>wt</i> -SFO | <i>fat-1</i> -SFO |
| <b>Saturate</b>  |                |                   |                |                   |
| 14:0             | 0.6 ± 0.1      | 0.9 ± 0.6         | 0.6 ± 0.0      | 0.6 ± 0.1         |
| 16:0             | 19.1 ± 3.4     | 19.6 ± 1.6        | 21.6 ± 0.2     | 20.6 ± 1.4        |
| 18:0             | 2.8 ± 0.3      | 2.5 ± 0.5         | 2.4 ± 0.6      | 2.4 ± 0.3         |
| 20:0             | 0.2 ± 0.1      | 0.2 ± 0.1         | 0.1 ± 0.1      | 0.2 ± 0.2         |
| 22:0             | 0.1 ± 0.0      | less than 0.05    | less than 0.05 | 0.1 ± 0.0         |
| 24:0             | less than 0.05 | less than 0.05    | none detected  | less than 0.05    |
| <b>Monoenoic</b> |                |                   |                |                   |
| 16:1             | 2.3 ± 0.5      | 3.0 ± 0.5         | 3.0 ± 0.7      | 2.6 ± 0.7         |
| 18:1             | 19.4 ± 2.1     | 22.4 ± 3.1        | 26.9 ± 4.1     | 24.0 ± 8.1        |
| 20:1             | 0.6 ± 0.2      | 0.6 ± 0.1         | 0.6 ± 0.2      | 0.6 ± 0.1         |
| 22:1             | 0.3 ± 0.1      | 0.2 ± 0.0         | 0.1 ± 0.1      | 0.1 ± 0.1         |
| 24:1             | none detected  | 0.0 ± 0.0         | none detected  | none detected     |
| <b>n6</b>        |                |                   |                |                   |
| 18:2n6           | 42.6 ± 1.1     | 43.1 ± 4.3        | 35.6 ± 3.3     | 40.7 ± 6.6        |
| 18:3n6           | 1.0 ± 0.2      | 0.7 ± 0.4         | 0.9 ± 0.1      | 0.8 ± 0.1         |
| 20:2n6           | 0.9 ± 0.3      | 0.7 ± 0.2         | 0.9 ± 0.4      | 0.8 ± 0.1         |
| 20:3n6           | 2.0 ± 1.0      | 1.5 ± 0.8         | 1.6 ± 0.3      | 1.6 ± 0.5         |
| 20:4n6           | 4.5 ± 2.0      | 2.0 ± 1.4         | 2.9 ± 0.5      | 2.1 ± 0.8         |
| 22:4n6           | 1.2 ± 0.8      | 0.5 ± 0.4         | 0.9 ± 0.4      | 0.4 ± 0.2         |
| 22:5n6           | 1.9 ± 1.6      | 0.3 ± 0.3         | 1.8 ± 1.5      | 0.3 ± 0.2         |
| <b>n3</b>        |                |                   |                |                   |
| 18:3n3           | 0.1 ± 0.0      | 0.3 ± 0.0         | 0.1 ± 0.0      | 0.3 ± 0.1         |
| 20:5n3           | none detected  | 0.1 ± 0.0         | none detected  | 0.2 ± 0.1         |
| 22:5n3           | less than 0.05 | 0.2 ± 0.1         | less than 0.05 | 0.3 ± 0.1         |
| 22:6n3           | 0.1 ± 0.1      | 1.1 ± 0.5         | 0.1 ± 0.0      | 1.0 ± 0.4         |
| n6/n3            | 124.4 ± 25.2   | 30.7 ± 13.4       | 218.2 ± 36.5   | 26.4 ± 8.9        |
| Saturate/PUFA    | 0.4            | 0.5               | 0.6            | 0.5               |

Relative mole percentage (±SD; n=3-5) of fatty acids from triglycerides of liver from Balb/c and C57 BL/6J strains.

*wt*-SFO, wild type mice fed with a safflower oil diet; *fat-1*-SFO, *fat-1* transgenic mice fed with a safflower oil diet.



Table S8: Fatty acid analysis on cholesterol esters of liver

| Fatty Acid       | Balb/c         |                   |
|------------------|----------------|-------------------|
|                  | <i>wt</i> -SFO | <i>fat-1</i> -SFO |
| <b>Saturate</b>  |                |                   |
| 14:0             | 0.9 ± 0.2      | 1.2 ± 0.6         |
| 16:0             | 12.5 ± 1.5     | 13.8 ± 2.2        |
| 18:0             | 7.7 ± 1.7      | 7.5 ± 2.5         |
| 20:0             | 0.3 ± 0.1      | 0.4 ± 0.2         |
| 22:0             | 0.2 ± 0.1      | 0.3 ± 0.1         |
| 24:0             | 0.1 ± 0.1      | none detected     |
| <b>Monoenoic</b> |                |                   |
| 16:1             | 5.9 ± 0.5      | 7.4 ± 1.1         |
| 18:1             | 27.5 ± 1.7     | 31.8 ± 6.0        |
| 20:1             | 0.4 ± 0.1      | 0.4 ± 0.1         |
| 22:1             | 3.0 ± 2.2      | 1.8 ± 0.5         |
| 24:1             | none detected  | none detected     |
| <b>n6</b>        |                |                   |
| 18:2n6           | 31.4 ± 3.8     | 29.1 ± 2.7        |
| 18:3n6           | 0.3 ± 0.0      | 0.2 ± 0.0         |
| 20:2n6           | 0.3 ± 0.1      | 0.2 ± 0.0         |
| 20:3n6           | 0.5 ± 0.1      | 0.4 ± 0.1         |
| 20:4n6           | 6.0 ± 0.9      | 2.6 ± 0.4         |
| 22:4n6           | 0.3 ± 0.1      | 0.1 ± 0.1         |
| 22:5n6           | 0.7 ± 0.2      | less than 0.05    |
| <b>n3</b>        |                |                   |
| 18:3n3           | 0.2 ± 0.1      | 0.5 ± 0.1         |
| 20:5n3           | none detected  | 0.1 ± 0.1         |
| 22:5n3           | none detected  | none detected     |
| 22:6n3           | 0.5 ± 0.5      | 1.0 ± 0.3         |
| n6/n3            | 21.6 ± 2.8     | 11.9 ± 2.6        |
| Saturate/PUFA    | 0.5            | 0.7               |

Relative mole percentage (±SD; n=3) of fatty acids from cholesterol esters of liver from Balb/c strain.

*wt*-SFO, wild type mice fed with a safflower oil diet; *fat-1*-SFO, fat-1 transgenic mice fed with a safflower oil diet.

Table S9: Fatty acid analysis on free fatty acids of liver

| Fatty Acid           | Balb/c         |                   |
|----------------------|----------------|-------------------|
|                      | <i>wt</i> -SFO | <i>fat-1</i> -SFO |
| <b>Saturate</b>      |                |                   |
| 14:0                 | 1.2 ± 0.1      | 0.9 ± 0.2         |
| 16:0                 | 26.9 ± 0.8     | 26.4 ± 0.7        |
| 18:0                 | 17.6 ± 2.5     | 14.4 ± 1.4        |
| 20:0                 | 0.4 ± 0.0      | 0.4 ± 0.1         |
| 22:0                 | 0.4 ± 0.1      | 0.3 ± 0.1         |
| 24:0                 | 0.1 ± 0.0      | 0.1 ± 0.0         |
| <b>Monoenoic</b>     |                |                   |
| 16:1                 | 1.7 ± 0.3      | 1.7 ± 0.2         |
| 18:1                 | 10.0 ± 1.2     | 10.8 ± 1.9        |
| 20:1                 | 0.4 ± 0.1      | 0.4 ± 0.1         |
| 22:1                 | 2.1 ± 0.6      | 2.7 ± 1.1         |
| 24:1                 | none detected  | less than 0.05    |
| <b>n6</b>            |                |                   |
| 18:2n6               | 22.1 ± 1.3     | 24.7 ± 1.8        |
| 18:3n6               | 0.5 ± 0.0      | 0.4 ± 0.1         |
| 20:2n6               | 0.6 ± 0.1      | 0.5 ± 0.1         |
| 20:3n6               | 0.9 ± 0.2      | 1.0 ± 0.2         |
| 20:4n6               | 10.5 ± 2.1     | 9.8 ± 1.3         |
| 22:4n6               | 0.7 ± 0.2      | 0.3 ± 0.1         |
| 22:5n6               | 1.8 ± 0.5      | 0.3 ± 0.1         |
| <b>n3</b>            |                |                   |
| 18:3n3               | 0.3 ± 0.1      | 0.4 ± 0.0         |
| 20:5n3               | none detected  | 0.3 ± 0.1         |
| 22:5n3               | none detected  | 0.2 ± 0.0         |
| 22:6n3               | 0.4 ± 0.0      | 3.4 ± 0.5         |
| <b>n6/n3</b>         | 20.8 ± 3.6     | 7.5 ± 0.5         |
| <b>Saturate/PUFA</b> | 1.2            | 1.0               |

Relative mole percentage (±SD; n=3) of fatty acids from free fatty acids of liver from Balb/c strain.

*wt*-SFO, wild type mice fed with a safflower oil diet; *fat-1*-SFO, fat-1 transgenic mice fed with a safflower oil diet.
